# Supplementary material for: Plasma IL-8 and ICOSLG as prognostic biomarkers in glioblastoma
Source: PubMed Central journal article supplement (PMC8284624; doi:10.1093/noajnl/vdab072), 2021-06-01
Supplement: vdab072_suppl_supplementary_materials.pdf [file vdab072_suppl_supplementary_materials.pdf]

## Plasma IL-8 and ICOSLG as prognostic biomarkers in glioblastoma

### Supplementary Data

**Table S1.** Immune-related proteins used for analysis, including LOD and percentage of missing data.

| Assay         | Uniprot ID                     | OlinkID                           | LOD            | Missing data freq. |
|---------------|--------------------------------|-----------------------------------|----------------|--------------------|
|               | Olink NPX<br>Manager 0.0.104.0 | Olink IMMUNO-<br>ONCOLOGY(v.3101) |                |                    |
| ADA           | P00813                         | OID00775                          | -0,06858       | 0%                 |
| <b>ADGRG1</b> | <b>Q9Y653</b>                  | <b>OID00764</b>                   | <b>1,09853</b> | <b>66%</b>         |
| ANG-1         | Q15389                         | OID00760                          | 0,96913        | 0%                 |
| ANGPT2        | O15123                         | OID00822                          | 0,21105        | 0%                 |
| <b>ARG1</b>   | <b>P05089</b>                  | <b>OID00815</b>                   | <b>2,91545</b> | <b>34%</b>         |
| CAIX          | Q16790                         | OID00773                          | 0,76390        | 0%                 |
| CASP-8        | Q14790                         | OID00827                          | 0,90698        | 0%                 |
| CCL17         | Q92583                         | OID00821                          | 0,48503        | 0%                 |
| CCL19         | Q99731                         | OID00794                          | 1,43011        | 0%                 |
| CCL20         | P78556                         | OID00837                          | 1,41494        | 0%                 |
| CCL23         | P55773                         | OID00811                          | 0,48554        | 0%                 |
| CCL3          | P10147                         | OID00813                          | 0,48405        | 0%                 |
| CCL4          | P13236                         | OID00796                          | 0,76242        | 0%                 |
| CD244         | Q9BZW8                         | OID00758                          | 1,70355        | 0%                 |
| CD27          | P26842                         | OID00800                          | 0,76846        | 0%                 |
| <b>CD28</b>   | <b>P10747</b>                  | <b>OID00793</b>                   | <b>0,79042</b> | <b>84%</b>         |
| CD4           | P01730                         | OID00776                          | -1,20711       | 0%                 |
| CD40          | P25942                         | OID00781                          | 0,99210        | 0%                 |
| CD40-L        | P29965                         | OID00756                          | 1,82765        | 0%                 |
| CD5           | P06127                         | OID00812                          | -0,35696       | 0%                 |
| CD70          | P32970                         | OID00808                          | 1,10837        | 0%                 |
| CD83          | Q01151                         | OID00841                          | 0,40025        | 0%                 |
| CD8A          | P01732                         | OID00772                          | 1,02123        | 0%                 |
| CRTAM         | O95727                         | OID00766                          | 1,41125        | 0%                 |
| CSF-1         | P09603                         | OID00843                          | 1,05081        | 0%                 |
| CX3CL1        | P78423                         | OID00806                          | 1,02620        | 0%                 |
| CXCL1         | P09341                         | OID00786                          | 1,08105        | 0%                 |
| CXCL10        | P02778                         | OID00807                          | 0,76898        | 0%                 |
| CXCL11        | O14625                         | OID00767                          | 1,09658        | 0%                 |
| <b>CXCL12</b> | <b>P48061</b>                  | <b>OID00824</b>                   | <b>1,09180</b> | <b>60%</b>         |
| CXCL13        | O43927                         | OID00830                          | 1,73236        | 0%                 |
| CXCL5         | P42830                         | OID00801                          | 2,07689        | 0%                 |
| CXCL9         | Q07325                         | OID00771                          | 0,96783        | 0%                 |
| DCN           | P07585                         | OID00817                          | 0,77150        | 0%                 |
| EGF           | P01133                         | OID00759                          | 0,90500        | 0%                 |
| FASLG         | P48023                         | OID00792                          | 0,40674        | 0%                 |

|                |               |          |          |     |
|----------------|---------------|----------|----------|-----|
| FGF2           | P09038        | OID00770 | 0,07186  | 55% |
| Gal-1          | P09382        | OID00798 | 1,54188  | 0%  |
| Gal-9          | O00182        | OID00779 | 0,57521  | 0%  |
| GZMA           | P12544        | OID00804 | 0,74031  | 0%  |
| GZMB           | P10144        | OID00840 | 0,80241  | 0%  |
| GZMH           | P20718        | OID00783 | 1,81638  | 1%  |
| HGF            | P14210        | OID00803 | 0,90257  | 0%  |
| HO-1           | P09601        | OID00805 | 2,49527  | 0%  |
| ICOSLG         | O75144        | OID00828 | 0,43372  | 0%  |
| IFN-beta       | P01574        | OID00774 | 0,47683  | 93% |
| IFN-gamma      | P01579        | OID00825 | 0,49844  | 98% |
| IL-1 alpha     | P01583        | OID00757 | 1,02999  | 98% |
| IL10           | P22301        | OID00809 | 1,71873  | 7%  |
| IL12           | P29459,P29460 | OID00842 | 2,08708  | 7%  |
| IL12RB1        | P42701        | OID00835 | 1,09594  | 33% |
| IL13           | P35225        | OID00836 | 1,03854  | 92% |
| IL18           | Q14116        | OID00782 | 1,33730  | 0%  |
| IL2            | P60568        | OID00778 | 0,48512  | 95% |
| IL-21          | Q9HBE4        | OID00834 | 1,10731  | 99% |
| IL33           | O95760        | OID00788 | 1,22384  | 98% |
| IL-35          | Q14213,P29459 | OID00797 | 1,76262  | 99% |
| IL4            | P05112        | OID00833 | 0,23474  | 77% |
| IL5            | P05113        | OID00802 | 1,97464  | 81% |
| IL6            | P05231        | OID00763 | 1,25271  | 3%  |
| IL7            | P13232        | OID00761 | 0,92327  | 0%  |
| IL8            | P10145        | OID00752 | 2,46291  | 0%  |
| KLRD1          | Q13241        | OID00839 | 0,79048  | 0%  |
| LAMP3          | Q9UQV4        | OID00826 | 1,39679  | 0%  |
| LAP TGF-beta-1 | P01137        | OID00785 | -0,47638 | 0%  |
| MCP-1          | P13500        | OID00765 | 0,81881  | 0%  |
| MCP-2          | P80075        | OID00795 | 1,02885  | 0%  |
| MCP-3          | P80098        | OID00755 | 1,29232  | 84% |
| MCP-4          | Q99616        | OID00768 | 0,25783  | 0%  |
| MIC-A/B        | Q29983,Q29980 | OID00820 | 0,53844  | 8%  |
| MMP12          | P39900        | OID00829 | 0,95760  | 0%  |
| MMP7           | P09237        | OID00814 | 1,98314  | 0%  |
| NCR1           | O76036        | OID00816 | 1,38045  | 0%  |
| NOS3           | P29474        | OID00777 | 1,50517  | 68% |
| PDCD1          | Q15116        | OID00791 | 1,70208  | 29% |
| PDGF subunit B | P01127        | OID00790 | 1,07446  | 0%  |
| PD-L1          | Q9NZQ7        | OID00799 | 2,50123  | 0%  |
| PD-L2          | Q9BQ51        | OID00831 | 0,44794  | 0%  |
| PGF            | P49763        | OID00762 | 1,20723  | 0%  |
| PTN            | P21246        | OID00823 | 0,69149  | 27% |

|              |               |                 |                 |            |
|--------------|---------------|-----------------|-----------------|------------|
| TIE2         | Q02763        | OID00754        | 0,84503         | 0%         |
| <b>TNF</b>   | <b>P01375</b> | <b>OID00838</b> | <b>1,45289</b>  | <b>94%</b> |
| TNFRSF12A    | Q9NP84        | OID00810        | 0,85042         | 0%         |
| TNFRSF21     | O75509        | OID00818        | 0,29462         | 0%         |
| TNFRSF4      | P43489        | OID00819        | 1,60074         | 3%         |
| TNFRSF9      | Q07011        | OID00753        | 0,04428         | 0%         |
| TNFSF14      | O43557        | OID00787        | 0,41363         | 0%         |
| TRAIL        | P50591        | OID00769        | 0,04635         | 0%         |
| TWEAK        | O43508        | OID00789        | -0,33856        | 0%         |
| VEGFA        | P15692        | OID00832        | 0,39146         | 0%         |
| <b>VEGFC</b> | <b>P49767</b> | <b>OID00784</b> | <b>-0,09811</b> | <b>38%</b> |
| VEGFR-2      | P35968        | OID00780        | 0,32967         | 0%         |

---

OLINK Immuno-Oncology panel v. 3101. Missing data freq: Percentage of data below LOD or missing. Proteins in red have >10% missing data. Abbreviations: LOD, limit of detection.

**Table S2.** Patient characteristics for Cohort 1 (Gliomas WHO grade II-IV).

| <b>Characteristics (Cohort 1)</b>        | <b>Gliomas WHO grade II-IV (n=158)</b> |
|------------------------------------------|----------------------------------------|
| <b>Age, years median (range)</b>         | 60 (23-89)                             |
| <b>Sex, n (%)</b>                        |                                        |
| Male                                     | 94 (59.5)                              |
| Female                                   | 64 (40.5)                              |
| <b>Diagnosis, n (%)</b>                  | <b>n=158</b>                           |
| Oligodendroglioma WHO grade II-III       | 7 (4.4)                                |
| Astrocytoma WHO grade II-III             | 17 (10.8)                              |
| GBM                                      | 134 (84.8)                             |
| <b>Survival outcome</b>                  | <b>n=156</b>                           |
| OS, weeks median (range)                 | 58 (1-233)                             |
| Lost to follow-up                        | 2                                      |
| <b>Status at end of follow-up, n (%)</b> | <b>n=156</b>                           |
| Dead                                     | 116 (74.4)                             |
| Alive                                    | 40 (25.6)                              |
| Lost to follow-up                        | 2                                      |

Abbreviation: OS: overall survival.

**Table S3.** Patient characteristics for Cohort 2 (Newly diagnosed GBM).

| <b>Characteristics (Cohort 2)</b>                  | <b>Newly diagnosed GBM (n=94)</b> |
|----------------------------------------------------|-----------------------------------|
| <b>Age, years median (range)</b>                   | 65 (33-89)                        |
| <b>Sex, n (%)</b>                                  |                                   |
| Male                                               | 57 (60.6)                         |
| Female                                             | 37 (39.4)                         |
| <b>Treatment, n (%)</b>                            | <b>n=94</b>                       |
| No treatment                                       | 7 (7.4)                           |
| Radiation therapy only                             | 3 (3.2)                           |
| Temozolomide (TMZ) only                            | 2 (2.1)                           |
| Stupps Regimen                                     | 65 (69.1)                         |
| Radiation therapy and concomittant TMZ             | 2 (2.1)                           |
| Palliative radiation therapy                       | 15 (16)                           |
| Missing information                                | 0                                 |
| <b>Steroid treatment at blood sampling, n (%)</b>  | <b>n=82</b>                       |
| 0                                                  | 2 (2.4)                           |
| 12.5-25 mg                                         | 3 (3.7)                           |
| 50-75 mg                                           | 28 (34.1)                         |
| 87.5-100 mg                                        | 46 (56.1)                         |
| >100 mg                                            | 3 (3.7)                           |
| Missing information                                | 12                                |
| <b>MGMT promotor methylation status, n (%)</b>     | <b>n=91</b>                       |
| Methylated                                         | 40 (44)                           |
| Non-methylated                                     | 51 (56)                           |
| Missing information                                | 3                                 |
| <b>Survival outcome</b>                            |                                   |
| PFS, weeks median (range)                          | 23 (3-233)                        |
| Missing (Uncertainty regarding recurrence date), n | 1                                 |
| OS, weeks median (range)                           | 58 (3-233)                        |
| Lost to follow-up, n                               | 2                                 |

Abbreviations: OS: overall survival; PFS: progression-free survival.

**Table S4.** Patient characteristics for Cohort 3 (Recurrent GBM).

| <b>Characteristics (Cohort 3)</b>                                           | <b>Recurrent GBM (n=40)</b> |
|-----------------------------------------------------------------------------|-----------------------------|
| <b>Age, years median (range)</b>                                            | 56 (37-79)                  |
| <b>Sex, n (%)</b>                                                           |                             |
| Male                                                                        | 22 (55)                     |
| Female                                                                      | 18 (45)                     |
| <b>Primary treatment regimen, n= 38 (%)</b>                                 | <b>n=38</b>                 |
| No treatment                                                                | 1 (2.6)                     |
| Radiation therapy only                                                      | 0                           |
| Temozolomide (TMZ) only                                                     | 0                           |
| Stupps Regimen                                                              | 35 (92.1)                   |
| Radiation therapy and concomittant TMZ                                      | 0                           |
| Palliative radiation therapy                                                | 2 (5.3)                     |
| Missing information                                                         | 2                           |
| <b>Number of recurrences, n (%)</b>                                         | <b>n=39</b>                 |
| First recurrence GBM                                                        | 25 (64.1)                   |
| Second recurrence GBM                                                       | 12 (30.8)                   |
| Third recurrence GBM                                                        | 2 (5.1)                     |
| Missing information                                                         | 1                           |
| <b>Treatment, n (%)</b>                                                     | <b>n=38</b>                 |
| No treatment                                                                | 18 (47.4)                   |
| Radiation therapy only                                                      | 1 (2.6)                     |
| Temozolomide only                                                           | 6 (15.8)                    |
| Lomustine only                                                              | 1 (2.6)                     |
| Avastin and Lomustine                                                       | 5 (13.2)                    |
| Clinical trial                                                              | 5 (13.2)                    |
| Radiation therapy and Temozolomide                                          | 2 (5.2)                     |
| Missing information                                                         | 2                           |
| <b>Survival outcome</b>                                                     |                             |
| OS (from blood sampling to death or end of follow-up), weeks median (range) | 33 (2-102)                  |
| OS (from diagnosis to death or end of follow-up), weeks median (range)      | 97 (30-785)                 |

Abbreviation: OS: overall survival.

**Table S5.** Immune-related proteins in plasma associated with prognosis in newly diagnosed GBM – Univariate analysis.

| Univariate analysis<br>Protein                             | PFS              |                  | OS               |               |
|------------------------------------------------------------|------------------|------------------|------------------|---------------|
|                                                            | HR (95% CI)      | P                | HR (95% CI)      | P             |
| Adenosine deaminase (ADA)                                  | 0.48 (0.28-0.81) | <b>0.0060</b>    | 0.44 (0.25-0.79) | <b>0.0063</b> |
| Arginase-1 (ARG1)                                          | 0.74 (0.53-1.02) | 0.062            | 0.69 (0.49-0.97) | <b>0.035</b>  |
| Caspase-8 (CASP_8)                                         | 0.72 (0.53-0.98) | <b>0.039</b>     | 0.76 (0.56-1.03) | 0.078         |
| T-cell surface glycoprotein CD4 (CD4)                      | 0.49 (0.22-1.08) | 0.076            | 0.39 (0.17-0.92) | <b>0.031</b>  |
| T-cell surface glycoprotein CD5 (CD5)                      | 0.58 (0.35-0.97) | <b>0.037</b>     | 0.55 (0.31-0.97) | <b>0.039</b>  |
| T-cell-specific surface glycoprotein CD28 (CD28)           | 0.34 (0.14-0.84) | <b>0.018</b>     | 0.44 (0.18-1.08) | 0.074         |
| Natural killer receptor 2B4 (CD244)                        | 0.33 (0.19-0.58) | <b>&lt;.0001</b> | 0.35 (0.19-0.62) | <b>0.0004</b> |
| C-X-C motif chemokine 5 (CXCL5)                            | 0.84 (0.72-0.98) | <b>0.029</b>     | 0.81 (0.69-0.95) | <b>0.012</b>  |
| Granzyme B (GZMB)                                          | 0.83 (0.65-1.06) | 0.14             | 0.77 (0.60-0.99) | <b>0.042</b>  |
| Galectin-1 (Gal-1)                                         | 0.41 (0.20-0.86) | <b>0.018</b>     | 0.51 (0.23-1.12) | 0.094         |
| ICOS ligand (ICOSLG)                                       | 0.29 (0.13-0.63) | <b>0.0017</b>    | 0.21 (0.09-0.51) | <b>0.0005</b> |
| Interleukin-8 (IL-8)                                       | 1.56 (1.18-2.07) | <b>0.0019</b>    | 1.41 (1.06-1.88) | <b>0.019</b>  |
| Natural cytotoxicity triggering receptor (NCR1)            | 0.51 (0.28-0.92) | <b>0.025</b>     | 0.65 (0.35-1.21) | 0.17          |
| Programmed cell death protein 1 (PDCD1)                    | 0.60 (0.37-0.97) | <b>0.035</b>     | 0.57 (0.33-0.97) | <b>0.039</b>  |
| Programmed cell death 1 ligand 1 (PD-L1)                   | 0.62 (0.39-1.00) | <b>0.048</b>     | 0.61 (0.37-1.01) | 0.054         |
| Pleiotrophin (PTN)                                         | 1.20 (1.00-1.45) | 0.050            | 1.24 (1.03-1.49) | <b>0.026</b>  |
| Angiopoietin-1 receptor (TIE2)                             | 0.44 (0.20-0.99) | <b>0.047</b>     | 0.41 (0.18-0.96) | <b>0.040</b>  |
| TNF-related apoptosis-inducing ligand (TRAIL)              | 0.39 (0.21-0.75) | <b>0.0045</b>    | 0.50 (0.24-1.01) | 0.054         |
| Tumor necrosis factor ligand superfamily member 12 (TWEAK) | 0.40 (0.19-0.83) | <b>0.014</b>     | 0.42 (0.19-0.93) | <b>0.032</b>  |
| Vascular endothelial growth factor receptor 2 (VEGFR-2)    | 0.51 (0.27-0.97) | <b>0.039</b>     | 0.45 (0.22-0.93) | <b>0.030</b>  |

Abbreviations: CI, confidence interval; GBM, glioblastoma; HR, hazard ratio; OS, overall survival; PFS, progression-free survival.

**Table S6.** Correlation between *CXCL8*, *ICOSLG* and immune cell fractions in TCGA dataset.

| Gene name | Cell type                    | Correlation  | P           |
|-----------|------------------------------|--------------|-------------|
| ICOSLG    | B cells memory               | 0,02762681   | 0,605449487 |
| ICOSLG    | B cells naive                | -0,08376948  | 0,11668919  |
| ICOSLG    | Dendritic cells activated    | -0,284980577 | 5,30046E-08 |
| ICOSLG    | Dendritic cells resting      | 0,052054803  | 0,330145324 |
| ICOSLG    | Eosinophils                  | -0,030688083 | 0,56607154  |
| ICOSLG    | Macrophages M0               | 0,094372037  | 0,077023009 |
| ICOSLG    | Macrophages M1               | 0,055560329  | 0,298572484 |
| ICOSLG    | Macrophages M2               | 0,120377382  | 0,023904181 |
| ICOSLG    | Mast cells activated         | 0,020831566  | 0,696915988 |
| ICOSLG    | Mast cells resting           | -0,133158318 | 0,01240076  |
| ICOSLG    | Monocytes                    | 0,0821432    | 0,123984602 |
| ICOSLG    | Neutrophils                  | 0,192539451  | 0,000279531 |
| ICOSLG    | NK cells activated           | -0,226022761 | 1,86051E-05 |
| ICOSLG    | NK cells resting             | 0,193494777  | 0,000260264 |
| ICOSLG    | Plasma cells                 | -0,008695561 | 0,87086019  |
| ICOSLG    | T cells CD4 memory activated | 0,153472894  | 0,003898215 |
| ICOSLG    | T cells CD4 memory resting   | -0,188904367 | 0,000365676 |
| ICOSLG    | T cells CD4 naive            | -0,037680315 | 0,481008716 |
| ICOSLG    | T cells CD8                  | 0,046201591  | 0,387479669 |
| ICOSLG    | T cells follicular helper    | -0,416442139 | 3,37932E-16 |
| ICOSLG    | T cells gamma delta          | -0,004384421 | 0,934673095 |
| ICOSLG    | T cells regulatory (Tregs)   | -0,007416498 | 0,889724512 |
| CXCL8     | B cells memory               | 0,004154324  | 0,938094432 |
| CXCL8     | B cells naive                | -0,076726124 | 0,150857923 |
| CXCL8     | Dendritic cells activated    | -0,092402266 | 0,083423387 |
| CXCL8     | Dendritic cells resting      | 0,037823329  | 0,479344286 |
| CXCL8     | Eosinophils                  | 0,004511816  | 0,932779351 |
| CXCL8     | Macrophages M0               | 0,140126349  | 0,008472078 |
| CXCL8     | Macrophages M1               | -0,217077881 | 4,00247E-05 |
| CXCL8     | Macrophages M2               | -0,153158447 | 0,003972988 |
| CXCL8     | Mast cells activated         | 0,305518663  | 4,85225E-09 |
| CXCL8     | Mast cells resting           | -0,315620351 | 1,39559E-09 |
| CXCL8     | Monocytes                    | 0,008495257  | 0,873809837 |
| CXCL8     | Neutrophils                  | 0,398185194  | 7,99864E-15 |
| CXCL8     | NK cells activated           | -0,301383819 | 7,97268E-09 |
| CXCL8     | NK cells resting             | 0,301781121  | 7,60377E-09 |
| CXCL8     | Plasma cells                 | -0,009128922 | 0,864484748 |
| CXCL8     | T cells CD4 memory activated | 0,108616395  | 0,041689669 |
| CXCL8     | T cells CD4 memory resting   | -0,134916211 | 0,011281894 |
| CXCL8     | T cells CD4 naive            | 0,021191795  | 0,691940083 |
| CXCL8     | T cells CD8                  | -0,030051734 | 0,574155565 |
| CXCL8     | T cells follicular helper    | -0,318219319 | 1,00507E-09 |
| CXCL8     | T cells gamma delta          | -0,068903308 | 0,197163298 |
| CXCL8     | T cells regulatory (Tregs)   | 0,075696342  | 0,156432739 |

Immune cell fractions used were estimated by Wang and colleagues<sup>1</sup>. Abbreviations: ICOSLG, ICOS ligand.



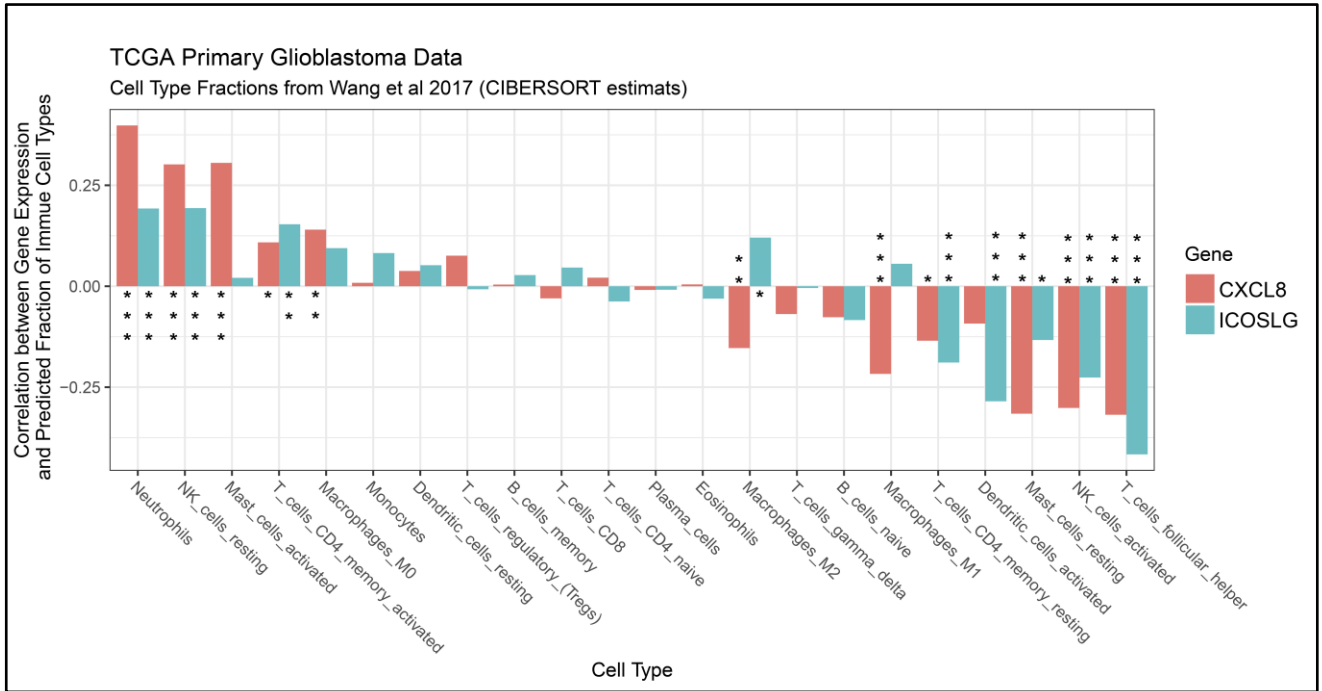

**Figure S1.** Correlation between *CXCL8*, *ICOSLG* and immune cell fractions in TCGA dataset. Immune cell fractions used were estimated by Wang and colleagues<sup>1</sup>. Abbreviations: ICOSLG, ICOS ligand. Statistical significance: \* $P < 0.05$ ; \*\* $P < 0.01$ ; \*\*\* $P < 0.001$ .

### **Supplement reference**

1. Wang Q, Hu B, Hu X, et al. Tumor evolution of glioma-intrinsic gene expression subtypes associates with immunological changes in the microenvironment. *Cancer cell*. 2017; 32(1):42-56.e46.
